# Supplementary material for: Controllable synthesis of ultrathin layered transition metal hydroxide/zeolitic imidazolate framework-67 hybrid nanosheets for high-performance supercapacitors
Source: Royal Society of Chemistry journal article supplement (doi:10.1039/d1ta02065j), 2021-01-01
Supplement: d1ta02065j1.pdf [file d1ta02065j1.pdf]

## Supporting Information

### Controllable Synthesis of Ultrathin Layered Transition Metallic Hydroxide /Zeolitic Imidazolate Framework-67 Hybrid Nanosheets for High- Performance Supercapacitors

Chunli Liu<sup>a</sup>, Yang Bai<sup>a,b\*</sup>, Ji Wang<sup>a</sup>, Ziming Qiu<sup>a</sup>, Huan Pang<sup>a\*</sup>

<sup>a</sup> School of Chemistry and Chemical Engineering, Yangzhou University, Yangzhou, 225000, Jiangsu, P. R. China.

<sup>b</sup> State Key Laboratory of Coordination Chemistry, Nanjing University, China.

E-mail:

huanpangchem@hotmail.com, panghuan@yzu.edu.cn (H. Pang),

ybai@yzu.edu.cn (Y. Bai)

## Contents

|                                                                                                                                                                                                                                                                                                                          |     |
|--------------------------------------------------------------------------------------------------------------------------------------------------------------------------------------------------------------------------------------------------------------------------------------------------------------------------|-----|
| <b>1 Experimental</b> .....                                                                                                                                                                                                                                                                                              | S4  |
| 1.1 Materials .....                                                                                                                                                                                                                                                                                                      | S4  |
| 1.2 Preparation of ultrathin $\alpha$ -Co(OH) <sub>2</sub> /ZIF-67 nanosheets .....                                                                                                                                                                                                                                      | S4  |
| 1.3 Preparation of ultrathin $\alpha$ -CoM <sub>0.05</sub> (OH) <sub>x</sub> /ZIF-67 nanosheets .....                                                                                                                                                                                                                    | S4  |
| 1.4 Preparation of 2D ultrathin $\alpha$ -Co(OH) <sub>2</sub> nanosheets .....                                                                                                                                                                                                                                           | S4  |
| 1.5 Preparation of 2D $\beta$ -Co(OH) <sub>2</sub> nanosheets .....                                                                                                                                                                                                                                                      | S5  |
| 1.6 Materials Characterization .....                                                                                                                                                                                                                                                                                     | S5  |
| 1.7 Electrochemical tests with a three-electrode system .....                                                                                                                                                                                                                                                            | S5  |
| 1.8 Evaluations with a two-electrode asymmetric supercapacitor .....                                                                                                                                                                                                                                                     | S6  |
| <b>Fig. S1.</b> AFM image and the corresponding height of $\alpha$ -Co(OH) <sub>2</sub> /ZIF-67 .....                                                                                                                                                                                                                    | S7  |
| <b>Fig. S2.</b> AFM image and the corresponding height of $\alpha$ -CoNi <sub>0.05</sub> (OH) <sub>x</sub> /ZIF-67. ....                                                                                                                                                                                                 | S8  |
| <b>Fig. S3.</b> (a) AFM image and the corresponding height of $\alpha$ -CoZn <sub>0.05</sub> (OH) <sub>x</sub> /ZIF-67.....                                                                                                                                                                                              | S9  |
| <b>Fig. S4.</b> (a-d) SEM and (e) TEM images of $\alpha$ -CoMn <sub>x</sub> (OH) <sub>x</sub> /ZIF-67 with diverse ratios of Co:Mn = (a) 1:0.01, (b) 1:0.1, (c) 1:0.5, (d) 1:1 and (e) 0:1. ....                                                                                                                         | S10 |
| <b>Fig. S5.</b> The Tyndall light scattering of (a) $\alpha$ -Co(OH) <sub>2</sub> /ZIF-67, (b) $\alpha$ -CoMn <sub>0.05</sub> (OH) <sub>x</sub> /ZIF-67, (c) $\alpha$ -CoNi <sub>0.05</sub> (OH) <sub>x</sub> /ZIF-67, (d) $\alpha$ -CoZn <sub>0.05</sub> (OH) <sub>x</sub> /ZIF-67 nanosheets in ethanol solution. .... | S11 |
| <b>Fig. S6.</b> (a) HRTEM and (b) SAED images of $\alpha$ -CoNi <sub>0.05</sub> (OH) <sub>x</sub> /ZIF-67. ....                                                                                                                                                                                                          | S12 |
| <b>Fig. S7.</b> (a) HRTEM and (b) SAED images of $\alpha$ -CoZn <sub>0.05</sub> (OH) <sub>x</sub> /ZIF-67 .....                                                                                                                                                                                                          | S13 |
| <b>Fig. S8.</b> EDX spectrum of $\alpha$ -CoMn <sub>0.05</sub> (OH) <sub>x</sub> /ZIF-67 .....                                                                                                                                                                                                                           | S14 |
| <b>Fig. S9.</b> EDX spectrum of $\alpha$ -CoNi <sub>0.05</sub> (OH) <sub>x</sub> /ZIF-67. ....                                                                                                                                                                                                                           | S15 |
| <b>Fig. S10.</b> EDX spectrum of $\alpha$ -CoZn <sub>0.05</sub> (OH) <sub>x</sub> /ZIF-67 .....                                                                                                                                                                                                                          | S16 |
| <b>Fig. S11.</b> Elemental mapping of C-K, N-K, O-K, Co-K and Ni-K of $\alpha$ -CoNi <sub>0.05</sub> (OH) <sub>x</sub> /ZIF-67 .....                                                                                                                                                                                     | S17 |
| <b>Fig. S12.</b> Elemental mapping of C-K, N-K, O-K, Co-K and Zn-K of $\alpha$ -CoZn <sub>0.05</sub> (OH) <sub>x</sub> /ZIF-67 .....                                                                                                                                                                                     | S18 |
| <b>Table S1.</b> The weight % and atomic % of related elements in the $\alpha$ -CoM <sub>0.05</sub> (OH) <sub>x</sub> /ZIF-67. ....                                                                                                                                                                                      | S19 |
| <b>Fig. S13.</b> XRD pattern of $\beta$ -Co(OH) <sub>2</sub> and $\alpha$ -Co(OH) <sub>2</sub> . The XRD pattern indicates two different crystalline types of hydroxide .....                                                                                                                                            | S20 |
| <b>Fig. S14.</b> SEM images of (a) $\beta$ -Co(OH) <sub>2</sub> and (c) $\alpha$ -Co(OH) <sub>2</sub> . TEM images of (b) $\beta$ -Co(OH) <sub>2</sub> and (d) $\alpha$ -Co(OH) <sub>2</sub> . ....                                                                                                                      | S21 |

|                                                                                                                                                                                                                                                                                                                                      |     |
|--------------------------------------------------------------------------------------------------------------------------------------------------------------------------------------------------------------------------------------------------------------------------------------------------------------------------------------|-----|
| <b>Fig. S15.</b> The pore-size distribution of (a) $\alpha$ -Co(OH) <sub>2</sub> /ZIF-67, (b) $\alpha$ -CoMn <sub>0.05</sub> (OH) <sub>x</sub> /ZIF-67, (c) $\alpha$ -CoNi <sub>0.05</sub> (OH) <sub>x</sub> /ZIF-67, (d) $\alpha$ -CoZn <sub>0.05</sub> (OH) <sub>x</sub> /ZIF-67 .....                                             | S22 |
| <b>Fig. S16.</b> Full-survey XPS spectrum of $\alpha$ -Co(OH) <sub>2</sub> /ZIF-67 and $\alpha$ -CoM <sub>0.05</sub> (OH) <sub>x</sub> /ZIF-67 .....                                                                                                                                                                                 | S23 |
| <b>Fig. S17.</b> CV curves of (a) $\alpha$ -CoMn <sub>0.05</sub> (OH) <sub>x</sub> /ZIF-67, (b) $\alpha$ -CoNi <sub>0.05</sub> (OH) <sub>x</sub> /ZIF-67, (c) $\alpha$ -CoZn <sub>0.05</sub> (OH) <sub>x</sub> /ZIF-67, (d) $\alpha$ -Co(OH) <sub>2</sub> /ZIF-67 and (e) $\alpha$ -Co(OH) <sub>2</sub> at various voltage window... | S24 |
| <b>Fig. S18.</b> CV curves of (a) $\alpha$ -CoMn <sub>0.05</sub> (OH) <sub>x</sub> /ZIF-67, (b) $\alpha$ -CoNi <sub>0.05</sub> (OH) <sub>x</sub> /ZIF-67, (c) $\alpha$ -CoZn <sub>0.05</sub> (OH) <sub>x</sub> /ZIF-67, (d) $\alpha$ -Co(OH) <sub>2</sub> /ZIF-67 and (e) $\alpha$ -Co(OH) <sub>2</sub> at various scan rates .....  | S25 |
| <b>Fig. S19.</b> GCD curves of (a) $\alpha$ -CoNi <sub>0.05</sub> (OH) <sub>x</sub> /ZIF-67, (b) $\alpha$ -CoZn <sub>0.05</sub> (OH) <sub>x</sub> /ZIF-67, (c) $\alpha$ -Co(OH) <sub>2</sub> /ZIF-67 and (d) $\alpha$ -Co (OH) <sub>2</sub> . .....                                                                                  | S26 |
| <b>Fig. S20.</b> Nyquist plots measured in the frequency range of 0.01-10 <sup>5</sup> Hz .....                                                                                                                                                                                                                                      | S27 |
| <b>Fig. S21.</b> CV curves of $\alpha$ -CoMn <sub>0.05</sub> (OH) <sub>x</sub> /ZIF-67//AC at various voltage window .....                                                                                                                                                                                                           | S28 |
| <b>Fig. S22.</b> GCD curves of $\alpha$ -CoMn <sub>0.05</sub> (OH) <sub>x</sub> /ZIF-67//AC at various voltage window of (a) 0-1.35 V, (b) 0-1.40 V, (c) 0-1.45 V, and (d) 0-1.55 V .....                                                                                                                                            | S29 |
| <b>Table S2.</b> The relevant electrochemical properties of Co(OH) <sub>2</sub> , LDH, ZIF-67 and their composites .....                                                                                                                                                                                                             | S30 |
| <b>References</b> .....                                                                                                                                                                                                                                                                                                              | S31 |

## 1 Experimental

### 1.1 Materials

Cobalt nitrate hexahydrate ( $\text{Co}(\text{NO}_3)_2 \cdot 6\text{H}_2\text{O}$ ), cobalt chloride hexahydrate ( $\text{CoCl}_2 \cdot 6\text{H}_2\text{O}$ ), manganese nitrate tetrahydrate ( $\text{Mn}(\text{NO}_3)_2 \cdot 4\text{H}_2\text{O}$ ), nickel nitrate dihydrate ( $\text{Ni}(\text{NO}_3)_2 \cdot 2\text{H}_2\text{O}$ ), zinc nitrate hexahydrate ( $\text{Zn}(\text{NO}_3)_2 \cdot 6\text{H}_2\text{O}$ ), 2-Melm, and *N,N*-dimethylformamide (DMF) were bought from Aladdin Industrial Corporation.

### 1.2 Preparation of ultrathin $\alpha\text{-Co}(\text{OH})_2/\text{ZIF-67}$ nanosheets

The 2D  $\alpha\text{-Co}(\text{OH})_2/\text{ZIF-67}$  nanosheets can be obtained by a one-pot co-precipitation reaction.  $\text{Co}(\text{NO}_3)_2 \cdot 6\text{H}_2\text{O}$  (1 mmol) was dissolved in a mixture solution including 15 mL of DMF and 15 mL of  $\text{H}_2\text{O}$  (denoted by solution A) and 2-Melm (4 mmol) was dissolved in the solution with the same composition (denoted by solution B). After stirring for 15 min, the solution A was injected into the solution B at once and the mixture was stirred at room temperature for 24 h. Finally, the sample was centrifuged and washed with distilled  $\text{H}_2\text{O}$  and ethanol to remove residue followed by freeze-drying.

### 1.3 Preparation of ultrathin $\alpha\text{-CoM}_{0.05}(\text{OH})_x/\text{ZIF-67}$ nanosheets

The 2D  $\alpha\text{-CoM}_{0.05}(\text{OH})_x/\text{ZIF-67}$  nanosheets can be obtained by using the similar method as  $\alpha\text{-Co}(\text{OH})_2/\text{ZIF-67}$ . One mmol  $\text{Co}(\text{NO}_3)_2 \cdot 6\text{H}_2\text{O}$  and 0.05 mmol  $\text{M}(\text{NO}_3)_2$  were dissolved in a mixture solution including 15 mL of DMF and 15 mL of  $\text{H}_2\text{O}$  (denoted by solution A) and 4 mmol 2-Melm was dissolved in the solution with the same composition (denoted by solution B). After stirring for 15 min, the solution A was injected into the solution B at once and the mixture was stirred at room temperature for 24 h. Finally, the sample was centrifuged and washed with distilled  $\text{H}_2\text{O}$  and ethanol to remove residue. The  $\alpha\text{-CoM}_{0.05}(\text{OH})_x/\text{ZIF-67}$  was obtained after freeze-drying.

### 1.4 Preparation of 2D ultrathin $\alpha\text{-Co}(\text{OH})_2$ nanosheets

The 2D  $\alpha\text{-Co}(\text{OH})_2$  nanosheets can be obtained by a plain precipitation reaction. 1 mmol  $\text{CoCl}_2 \cdot 6\text{H}_2\text{O}$  was dissolved in 30 mL distilled  $\text{H}_2\text{O}$ , and  $\text{NH}_3 \cdot \text{H}_2\text{O}$  was added to regulate the

alkaline environment. After stirring for 24h, the sample was centrifuged and washed with water and ethanol to remove residue. The  $\alpha$ -Co(OH)<sub>2</sub> was obtained after freeze-drying.

### **1.5 Preparation of 2D $\beta$ -Co(OH)<sub>2</sub> nanosheets**

The 2D  $\beta$ -Co(OH)<sub>2</sub> nanosheets can be obtained by a plain precipitation reaction. 1 mmol Co(NO<sub>3</sub>)<sub>2</sub>·6H<sub>2</sub>O was dissolved in 60 mL distilled H<sub>2</sub>O, and KOH was added to regulate the alkaline environment. After stirring for 24h, the sample was centrifuged and washed with water and ethanol to remove residue. The  $\beta$ -Co(OH)<sub>2</sub> was obtained after freeze-drying.

### **1.6 Materials Characterization**

The detailed microstructures and morphology were observed by field emission scanning electron microscopy (FE-SEM, Zeiss-Supra55) under the acceleration voltage of 5.0 kV) and transmission electron microscopy (TEM, JEM-2100 instrument). High-resolution TEM (HRTEM) images, selected area electron diffraction (SAED) images, and elemental mapping were captured on a Tecnai G2 F30 at an acceleration voltage of 300 kV. The atomic force microscope (AFM) was performed into this sample using a Nanoscope V Multimode 8 scanning probe microscope from Bruker Corporation. The crystal phase of the as-synthesized products was performed by X-ray diffraction (XRD) on a Bruker D8 Advanced X-ray Diffractometer (Cu-K $\alpha$  radiation:  $\lambda = 0.15406$  nm). Fourier transform infrared (FTIR) spectra were supplied to characterize their information of chemical bonds or functional groups on a Cary 610/670. The specific surface area was obtained from the N<sub>2</sub> adsorption/desorption isotherms and was calculated by the Brunauer-Emmett-Teller (BET) method on Autosorb IQ3. The surface composition and valence states were analyzed by X-ray photoelectron spectra (XPS) on a Thermo Scientific ESCALAB 250 apparatus.

### **1.7 Electrochemical tests with a three-electrode system**

For the three-electrode cell, the working electrode was obtained by mixing the active materials, acetylene black, and polytetrafluoroethylene (PTFE) at a weight ratio of 80 : 15 : 5. Then, a few drops of isopropanol were added into the above mixture and coated on a piece of nickel foam (1×1 cm<sup>-2</sup>, current collector), which was next drying and pressed into a thin foil

at a pressure of 8~10 MPa. The typical mass loading of the electrode material was 1.0~1.5 mg. The reference and counter electrode were Hg/HgO (3.0 M KOH) and Pt wire, respectively. The cyclic voltammetry (CV), galvanostatic charge discharge (GCD), and electrochemical impedance spectra (EIS) were tested on a CHI 760E electrochemical workstation in 3.0 M KOH. The specific capacitance (C) was calculated according to the following equation:

$$C = \frac{\int I dt}{m \Delta V} \quad (S1)$$

$$C = \frac{I \Delta t}{m \Delta V} \quad (S2)$$

here, I represents discharge current (A),  $\Delta t$  represents discharge time (s), m represents mass of electroactive components (g) and  $\Delta V$  represents potential window (V).

### 1.8 Evaluations with a two-electrode asymmetric supercapacitor

As for the manufacture of asymmetrical supercapacitor,  $\alpha$ -CoMn<sub>0.05</sub>(OH)<sub>x</sub>/ZIF-67 material and AC were used as positive electrode and negative electrode, respectively. The  $\alpha$ -CoMn<sub>0.05</sub>(OH)<sub>x</sub>/ZIF-67 (or AC), acetylene black, and PTFE were milled according to the above proportions and coated on nickel foam. The electrochemical tests of CV and GCD were also tested on a CHI 760E electrochemical workstation in 3.0 M KOH. The C was calculated according to the formula (S1) and (S2), and the power density (P, W kg<sup>-1</sup>)/energy density (E, Wh kg<sup>-1</sup>) was calculated according to the following equations:

$$E = \frac{C \Delta V^2}{2} \quad (S3)$$

$$P = \frac{E}{\Delta t} \quad (S4)$$

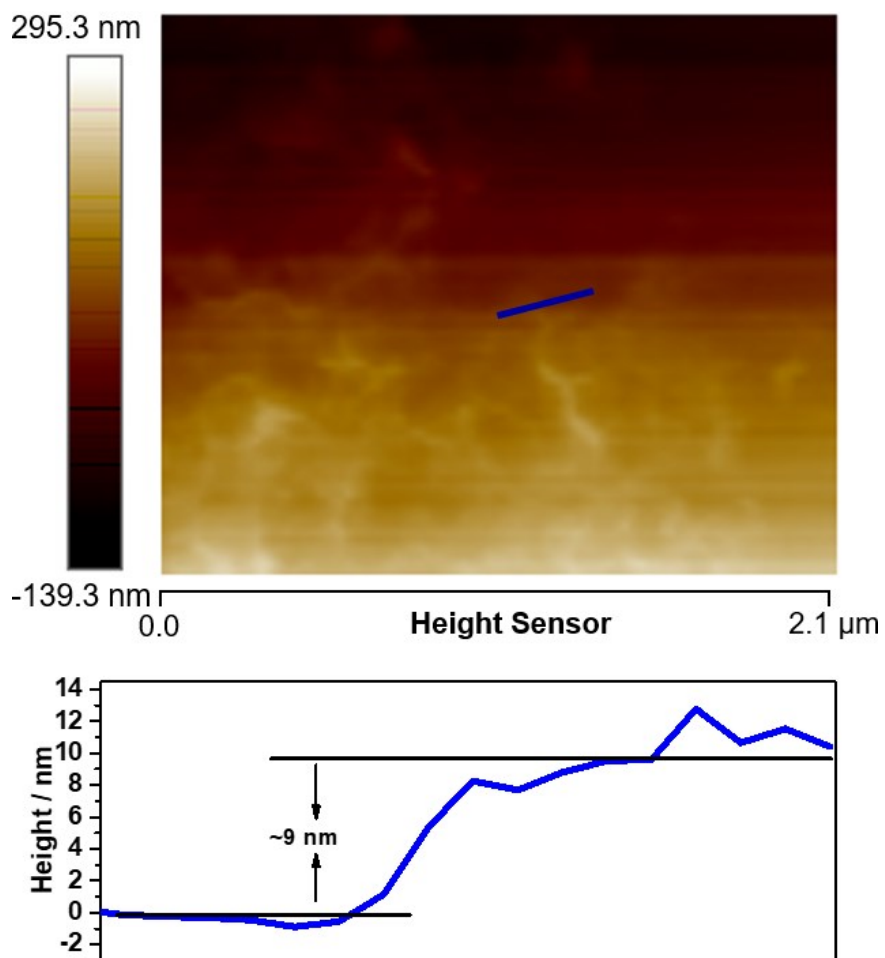

**Fig. S1.** AFM image and the corresponding thickness of  $\alpha$ -Co(OH)<sub>2</sub>/ZIF-67.

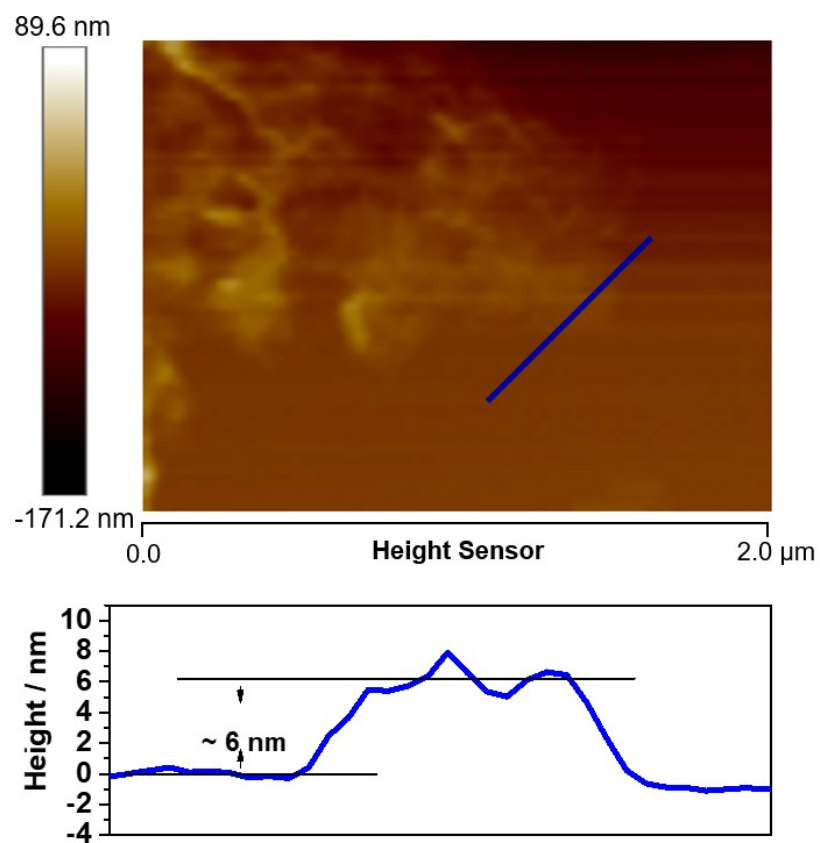

**Fig. S2.** AFM image and the corresponding thickness of  $\alpha\text{-CoNi}_{0.05}(\text{OH})_x/\text{ZIF-67}$ .



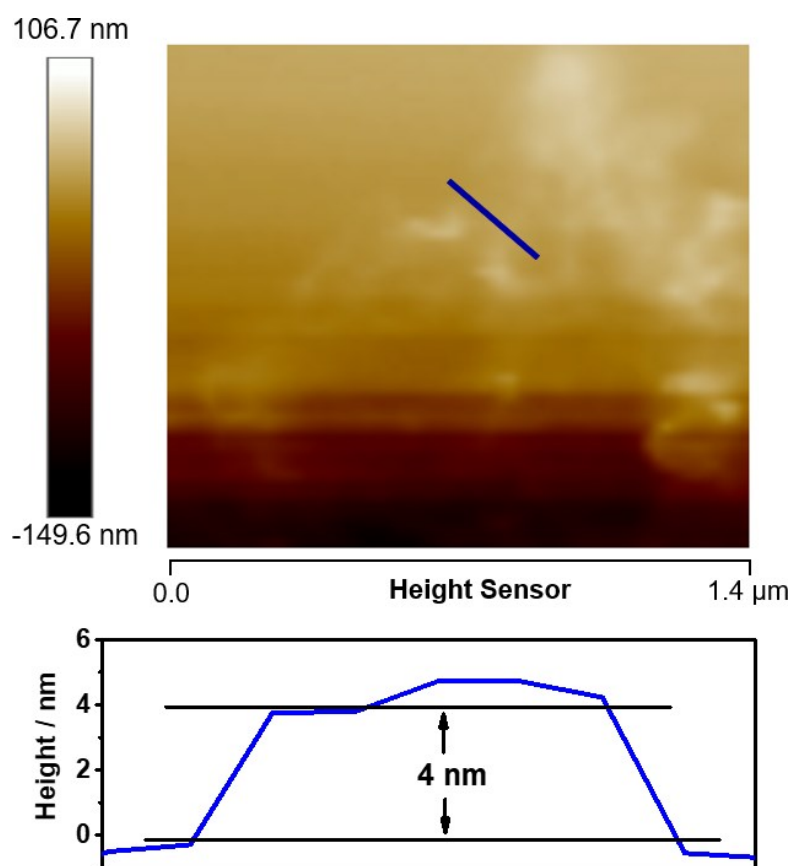

**Fig. S3.** (a) AFM image and the corresponding thickness of  $\alpha\text{-CoZn}_{0.05}(\text{OH})_x/\text{ZIF-67}$ .

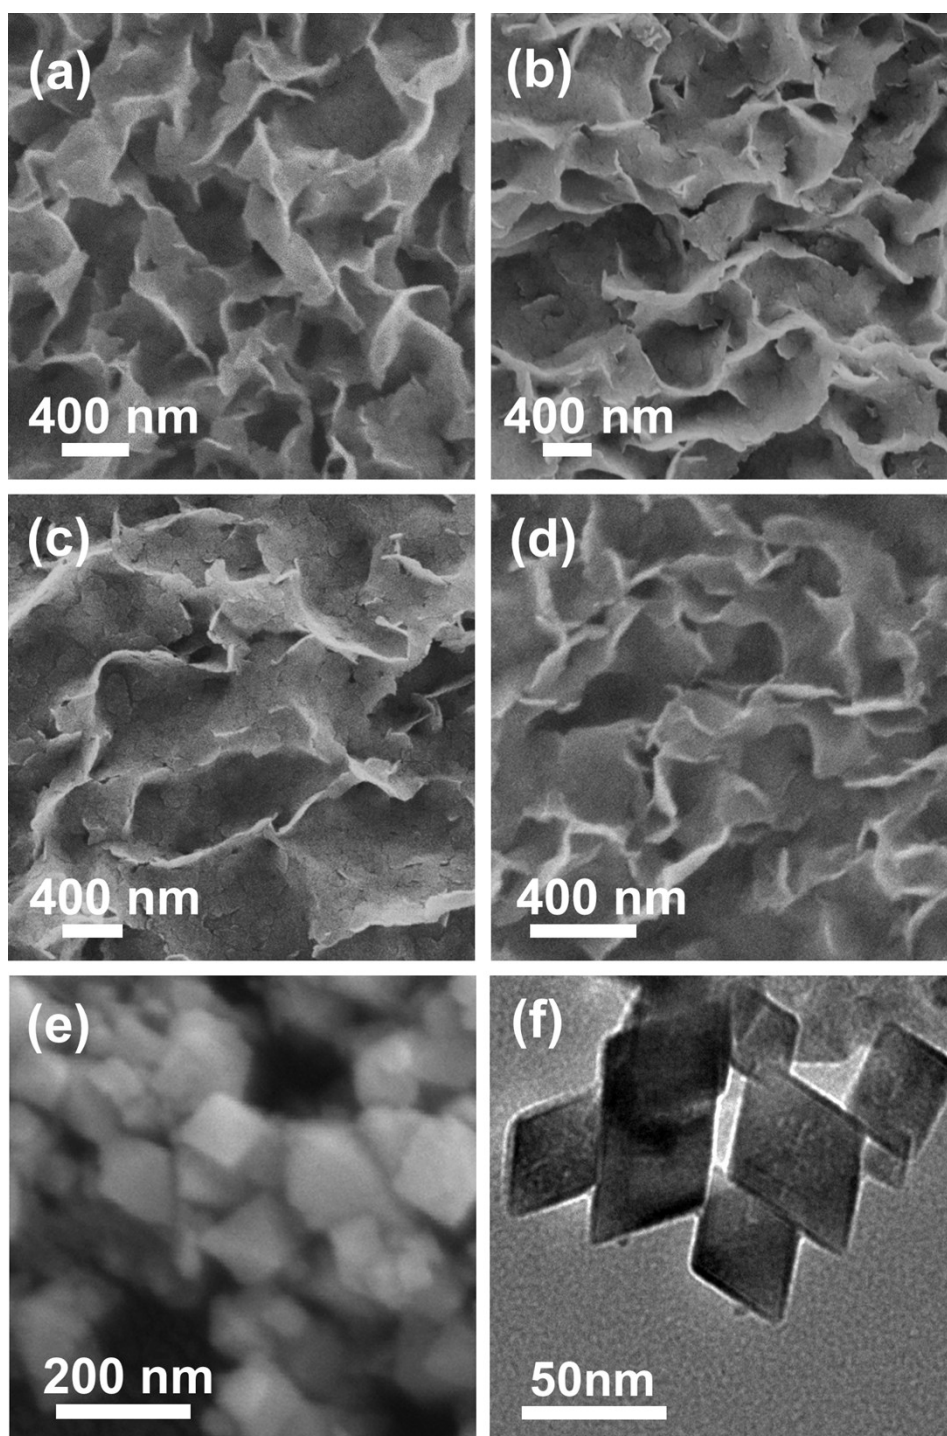

**Fig. S4.** (a-e) SEM and (f) TEM images of  $\alpha\text{-CoMn}_x(\text{OH})_x/\text{ZIF-67}$  with diverse ratios of Co:Mn = (a) 1:0.01, (b) 1:0.1, (c) 1:0.5, (d) 1:1 and (e, f) 0:1.

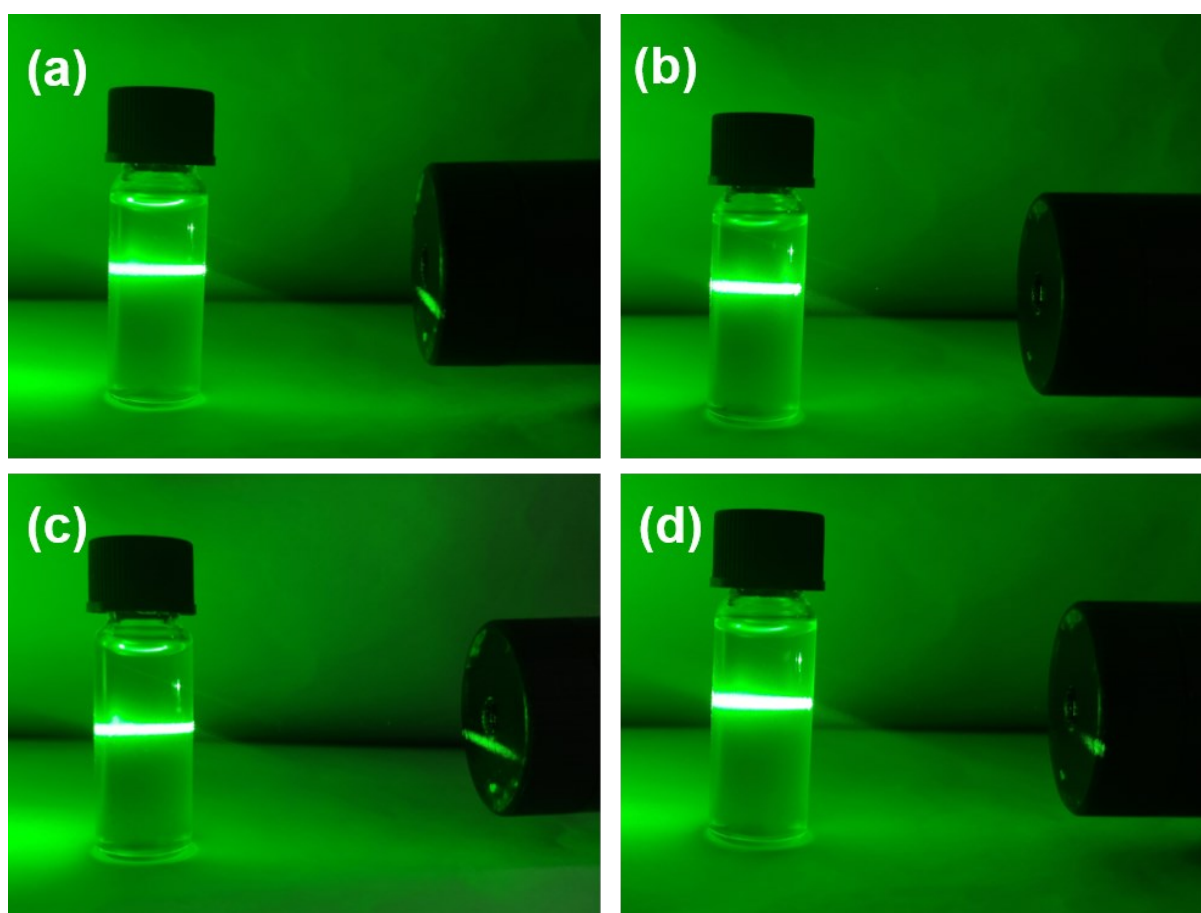

**Fig. S5.** The Tyndall light scattering of (a)  $\alpha$ -Co(OH)<sub>2</sub>/ZIF-67, (b)  $\alpha$ -CoMn<sub>0.05</sub>(OH)<sub>x</sub>/ZIF-67, (c)  $\alpha$ -CoNi<sub>0.05</sub>(OH)<sub>x</sub>/ZIF-67, (d)  $\alpha$ -CoZn<sub>0.05</sub>(OH)<sub>x</sub>/ZIF-67 nanosheets in ethanol solution.

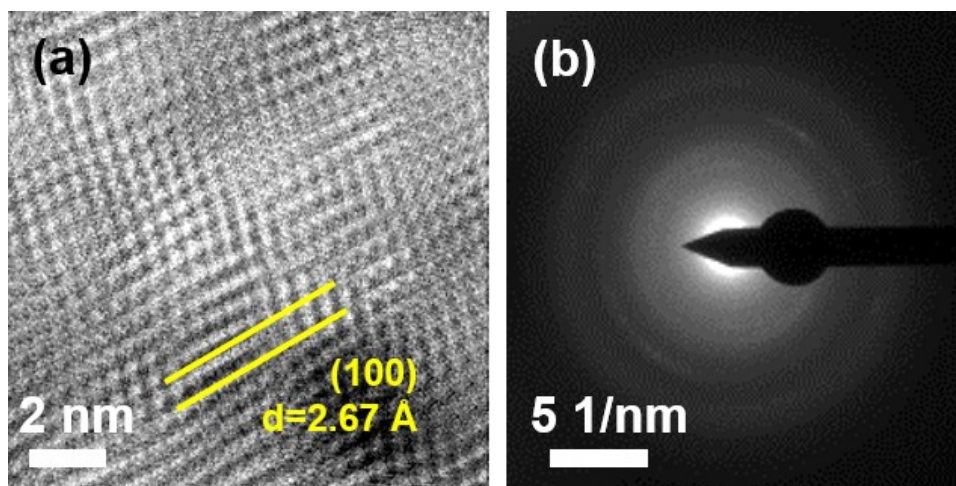

**Fig. S6.** (a) HRTEM and (b) SAED images of  $\alpha\text{-CoNi}_{0.05}(\text{OH})_x/\text{ZIF-67}$ .

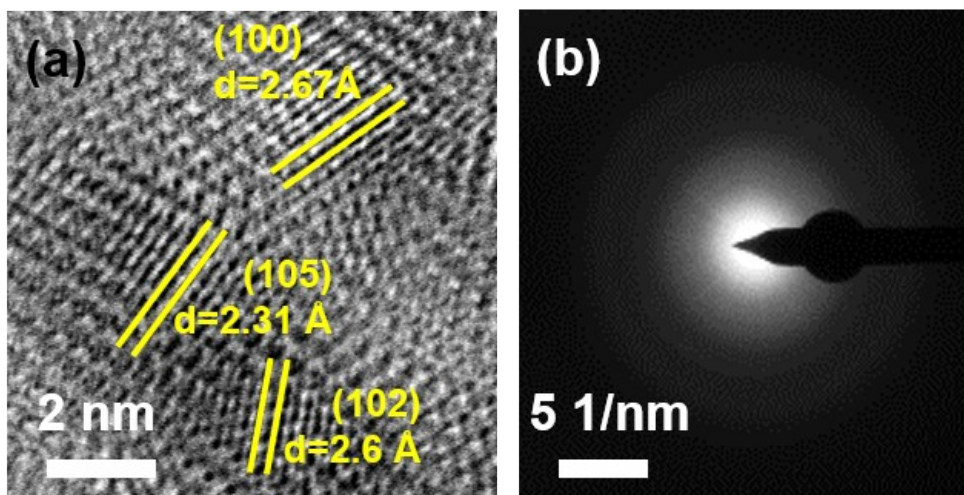

Fig. S7. (a) HRTEM and (b) SAED images of  $\alpha\text{-CoZn}_{0.05}(\text{OH})_x/\text{ZIF-67}$ .

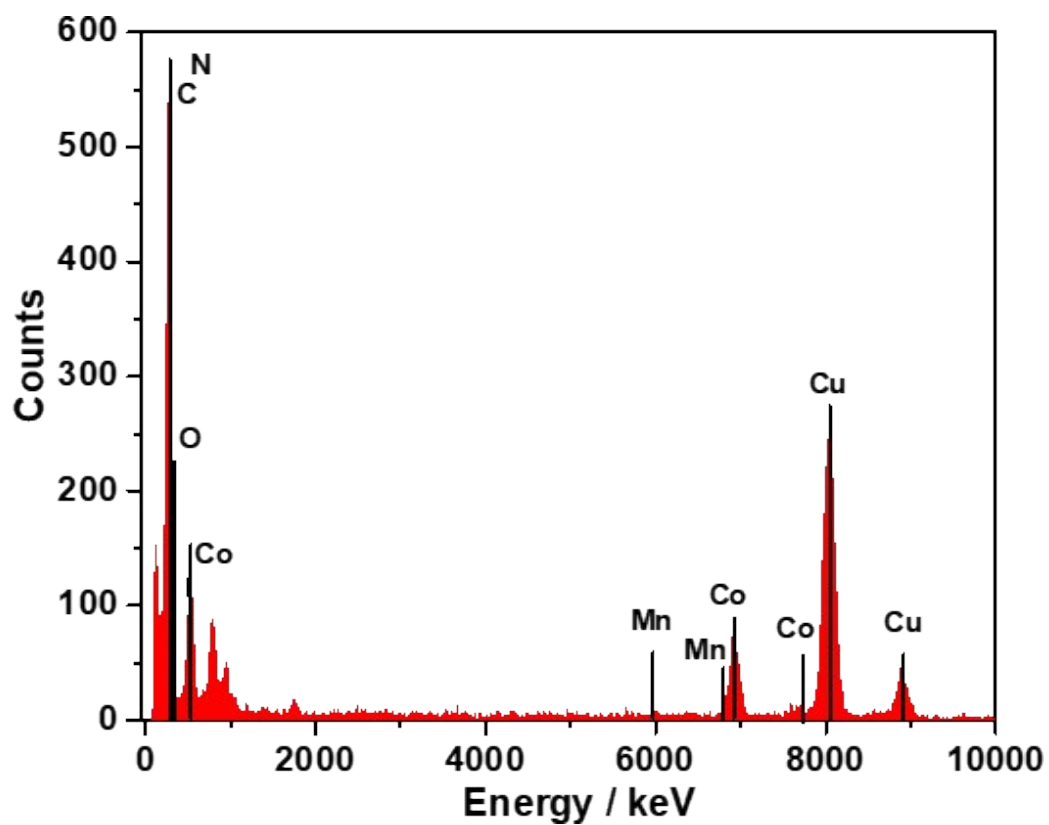

**Fig. S8.** EDS analysis of  $\alpha$ -CoMn<sub>0.05</sub>(OH)<sub>x</sub>/ZIF-67.

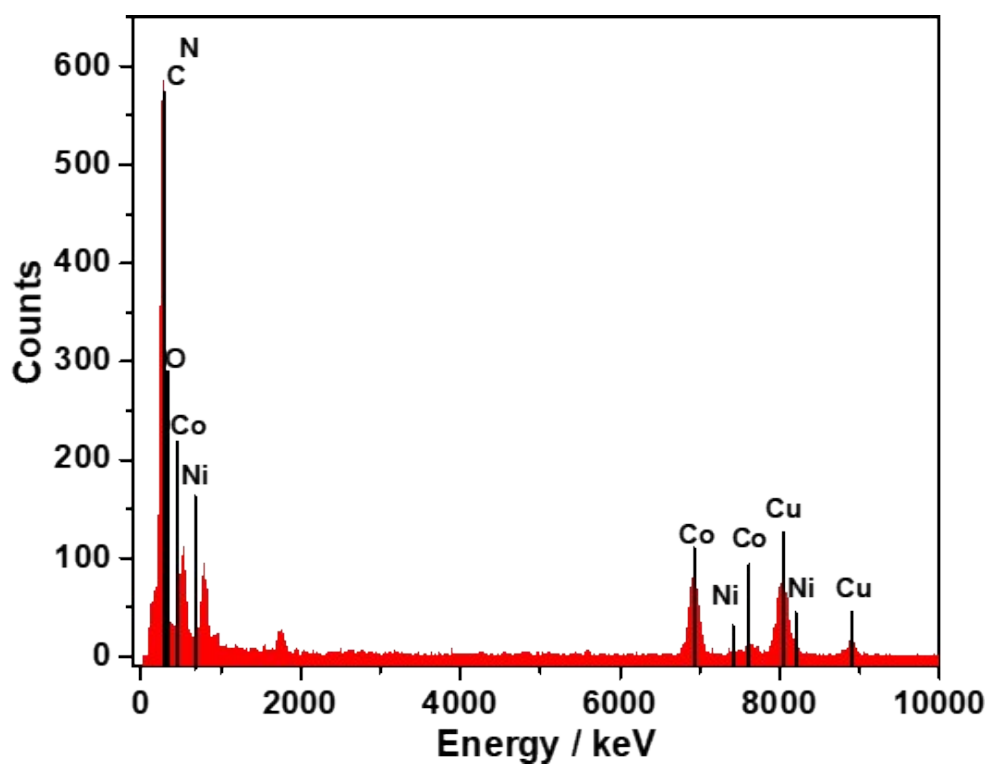

Fig. S9. EDS analysis of  $\alpha$ -CoNi<sub>0.05</sub>(OH)<sub>x</sub>/ZIF-67.

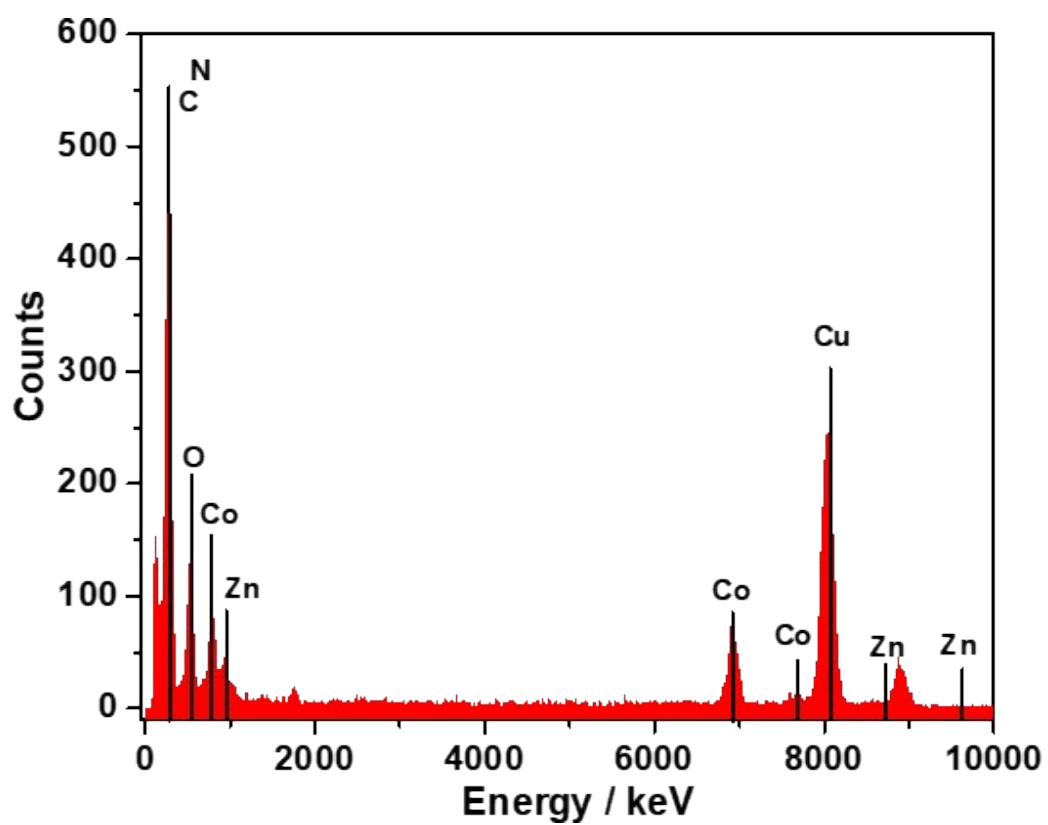

Fig. S10. EDS analysis of  $\alpha$ -CoZn<sub>0.05</sub>(OH)<sub>x</sub>/ZIF-67.



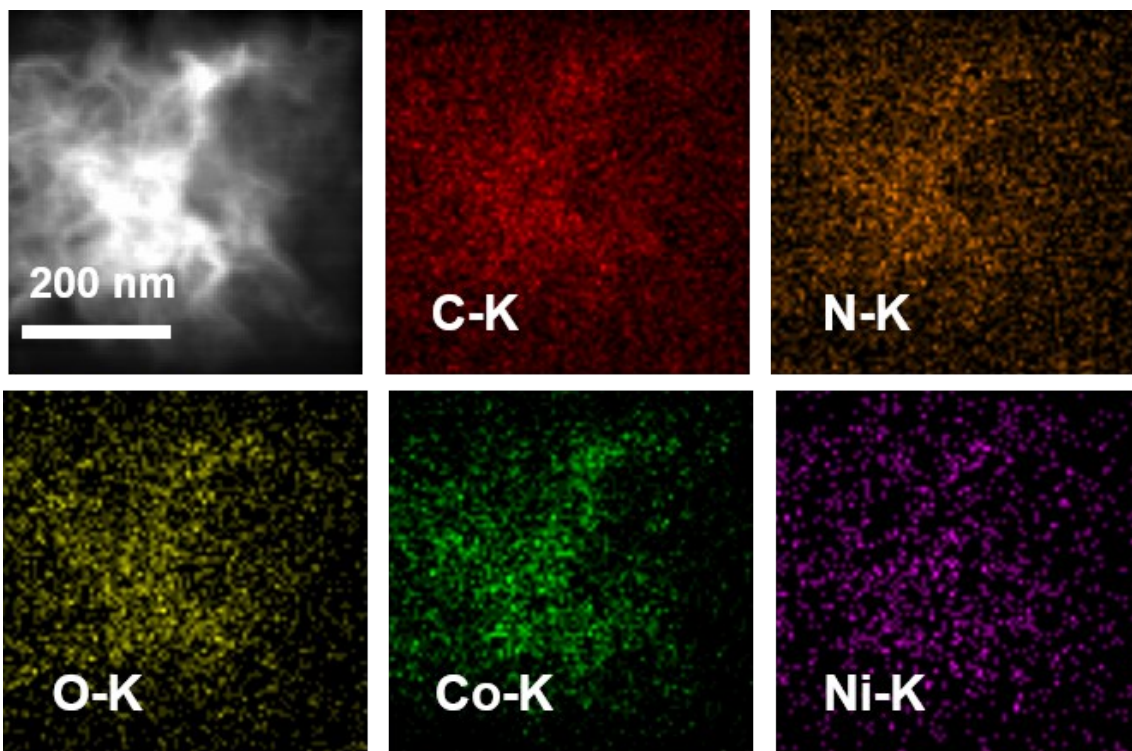

**Fig. S11.** Elemental mapping of C-K, N-K, O-K, Co-K and Ni-K of  $\alpha$ -CoNi<sub>0.05</sub>(OH)<sub>x</sub>/ZIF-67.

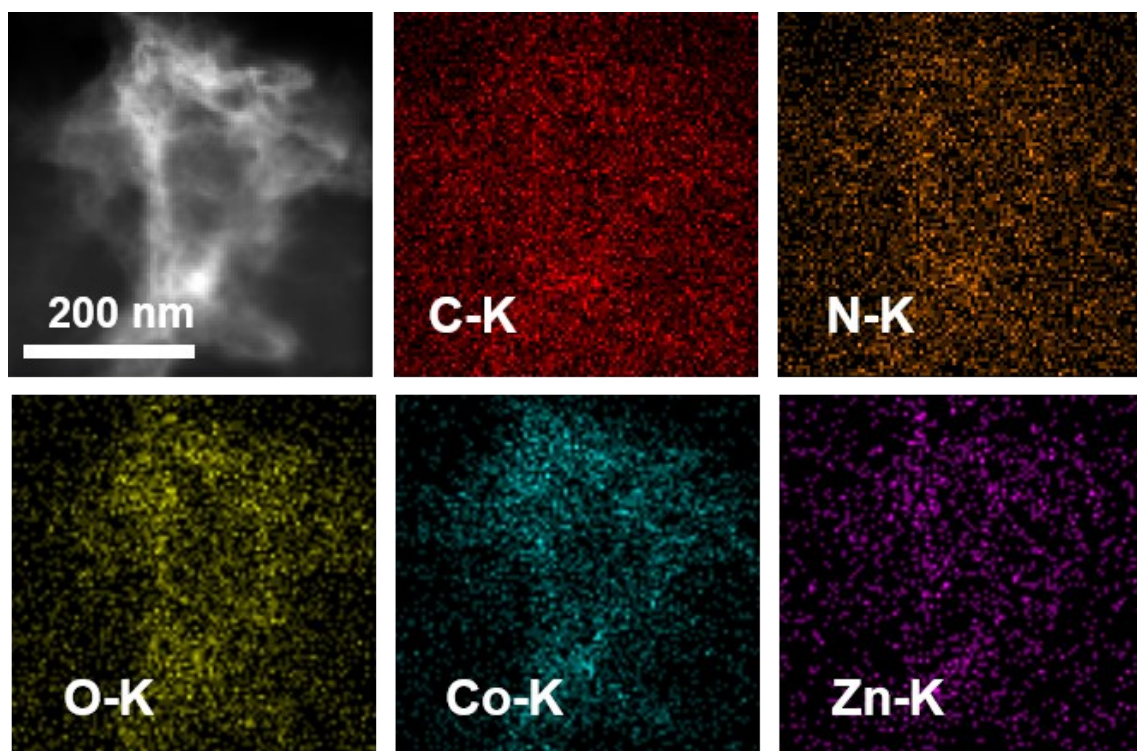

**Fig. S12.** Elemental mapping of C-K, N-K, O-K, Co-K and Zn-K of  $\alpha\text{-CoZn}_{0.05}(\text{OH})_x/\text{ZIF-67}$ .

Table S1. The weight % and atomic % of related elements in the  $\alpha$ -CoM<sub>0.05</sub>(OH)<sub>x</sub>/ZIF-67.

| Element | $\alpha$ -CoMn <sub>0.05</sub> (OH) <sub>x</sub> /ZIF-67 |          | $\alpha$ -CoNi <sub>0.05</sub> (OH) <sub>x</sub> /ZIF-67 |          | $\alpha$ -CoZn <sub>0.05</sub> (OH) <sub>x</sub> /ZIF-67 |          |
|---------|----------------------------------------------------------|----------|----------------------------------------------------------|----------|----------------------------------------------------------|----------|
|         | Weight %                                                 | Atomic % | Weight %                                                 | Atomic % | Weight %                                                 | Atomic % |
| C       | 82.90                                                    | 90.27    | 81.37                                                    | 89.75    | 80.57                                                    | 88.75    |
| N       | 1.45                                                     | 1.36     | 2.58                                                     | 2.44     | 1.58                                                     | 1.49     |
| O       | 8.20                                                     | 6.70     | 6.94                                                     | 5.75     | 9.56                                                     | 7.91     |
| Co      | 7.06                                                     | 1.56     | 8.59                                                     | 1.93     | 7.55                                                     | 1.69     |
| M       | 0.36                                                     | 0.08     | 0.48                                                     | 0.11     | 0.71                                                     | 0.14     |

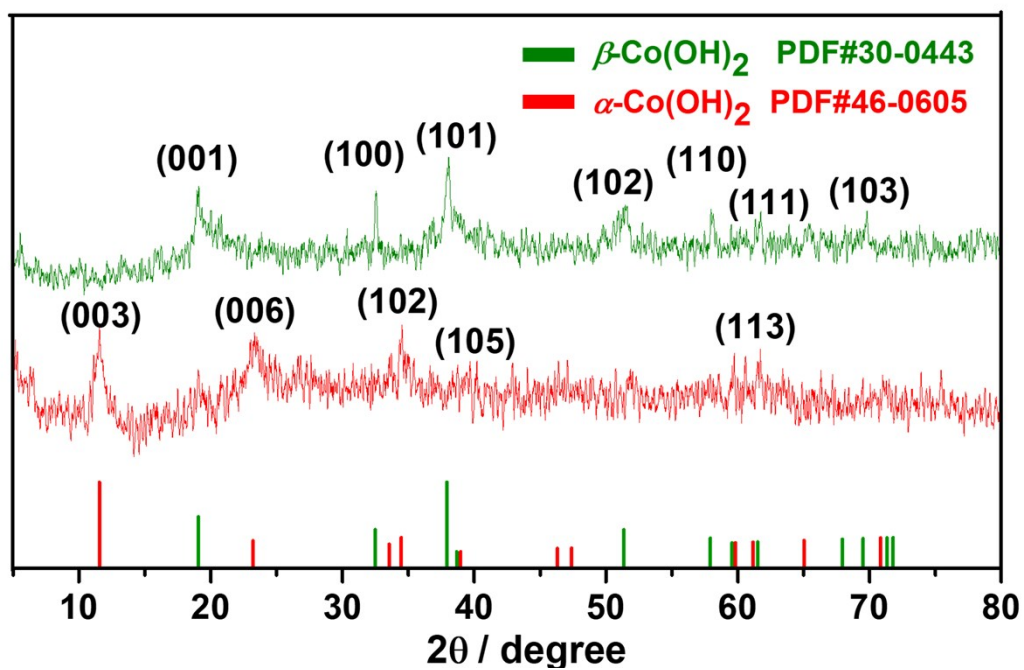

**Fig. S13.** XRD patterns of  $\beta\text{-Co(OH)}_2$  and  $\alpha\text{-Co(OH)}_2$ . The XRD patterns indicate two different crystalline types of the hydroxides.

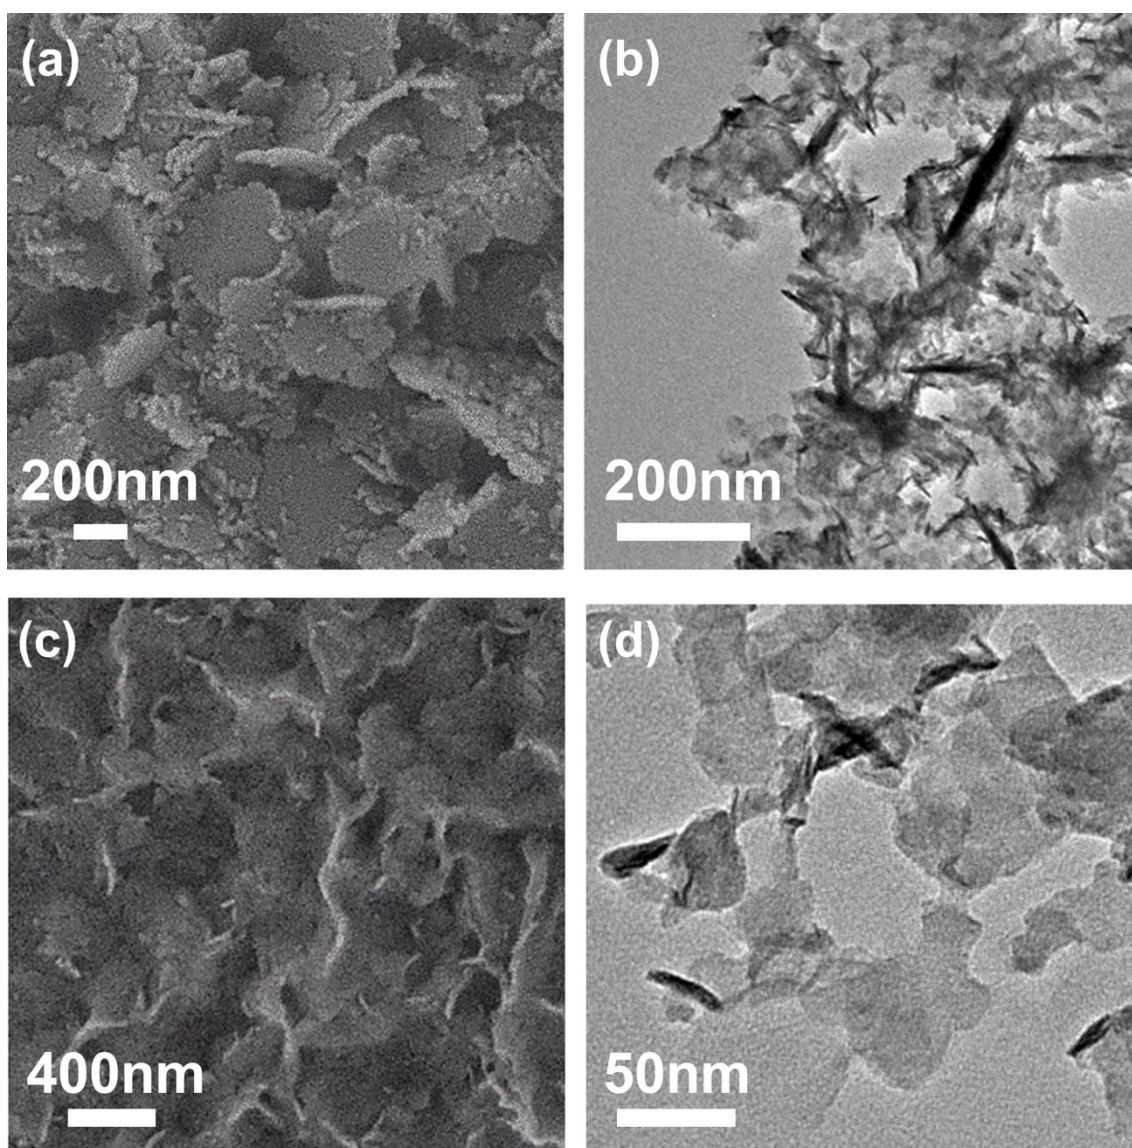

**Fig. S14.** SEM images of (a)  $\beta$ -Co(OH)<sub>2</sub> and (c)  $\alpha$ -Co(OH)<sub>2</sub>. TEM images of (b)  $\beta$ -Co(OH)<sub>2</sub> and (d)  $\alpha$ -Co(OH)<sub>2</sub>.

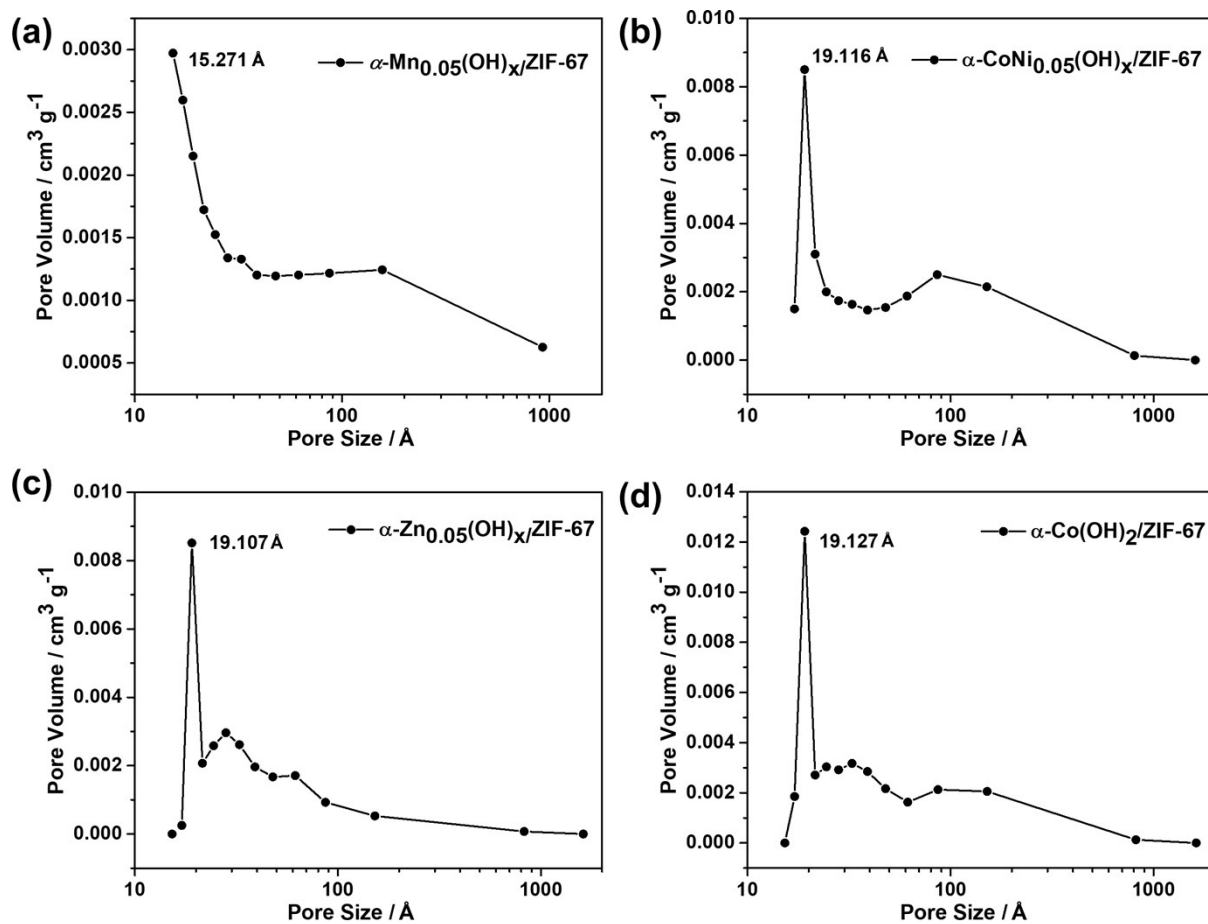

**Fig. S15.** The pore-size distribution of (a)  $\alpha$ -Co(OH)<sub>2</sub>/ZIF-67, (b)  $\alpha$ -CoMn<sub>0.05</sub>(OH)<sub>x</sub>/ZIF-67, (c)  $\alpha$ -CoNi<sub>0.05</sub>(OH)<sub>x</sub>/ZIF-67, (d)  $\alpha$ -CoZn<sub>0.05</sub>(OH)<sub>x</sub>/ZIF-67.

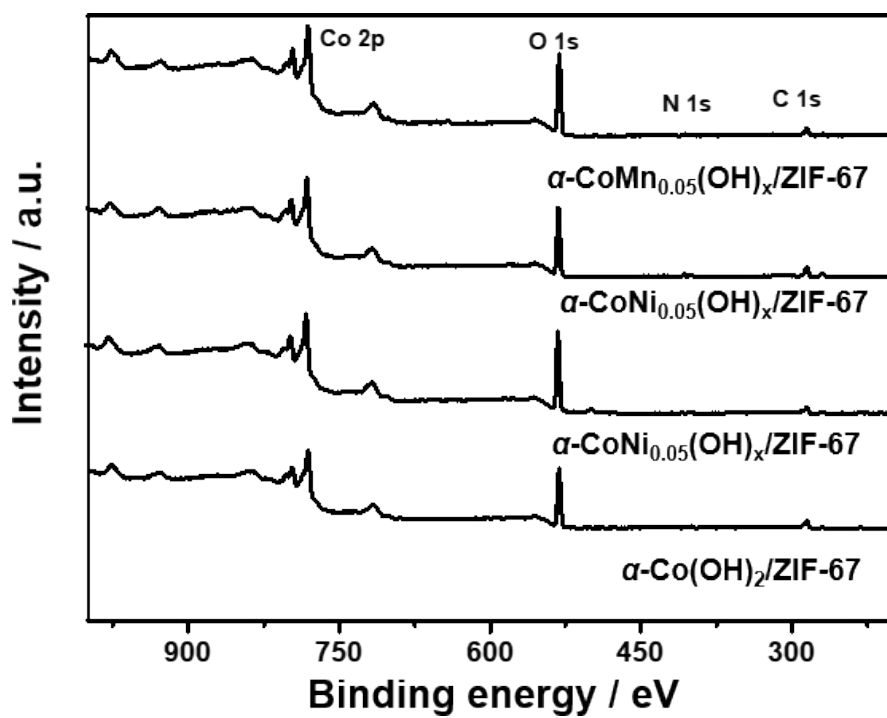

**Fig. S16.** Full-survey XPS spectrum of  $\alpha\text{-Co}(\text{OH})_2/\text{ZIF-67}$  and  $\alpha\text{-CoMn}_{0.05}(\text{OH})_x/\text{ZIF-67}$ .

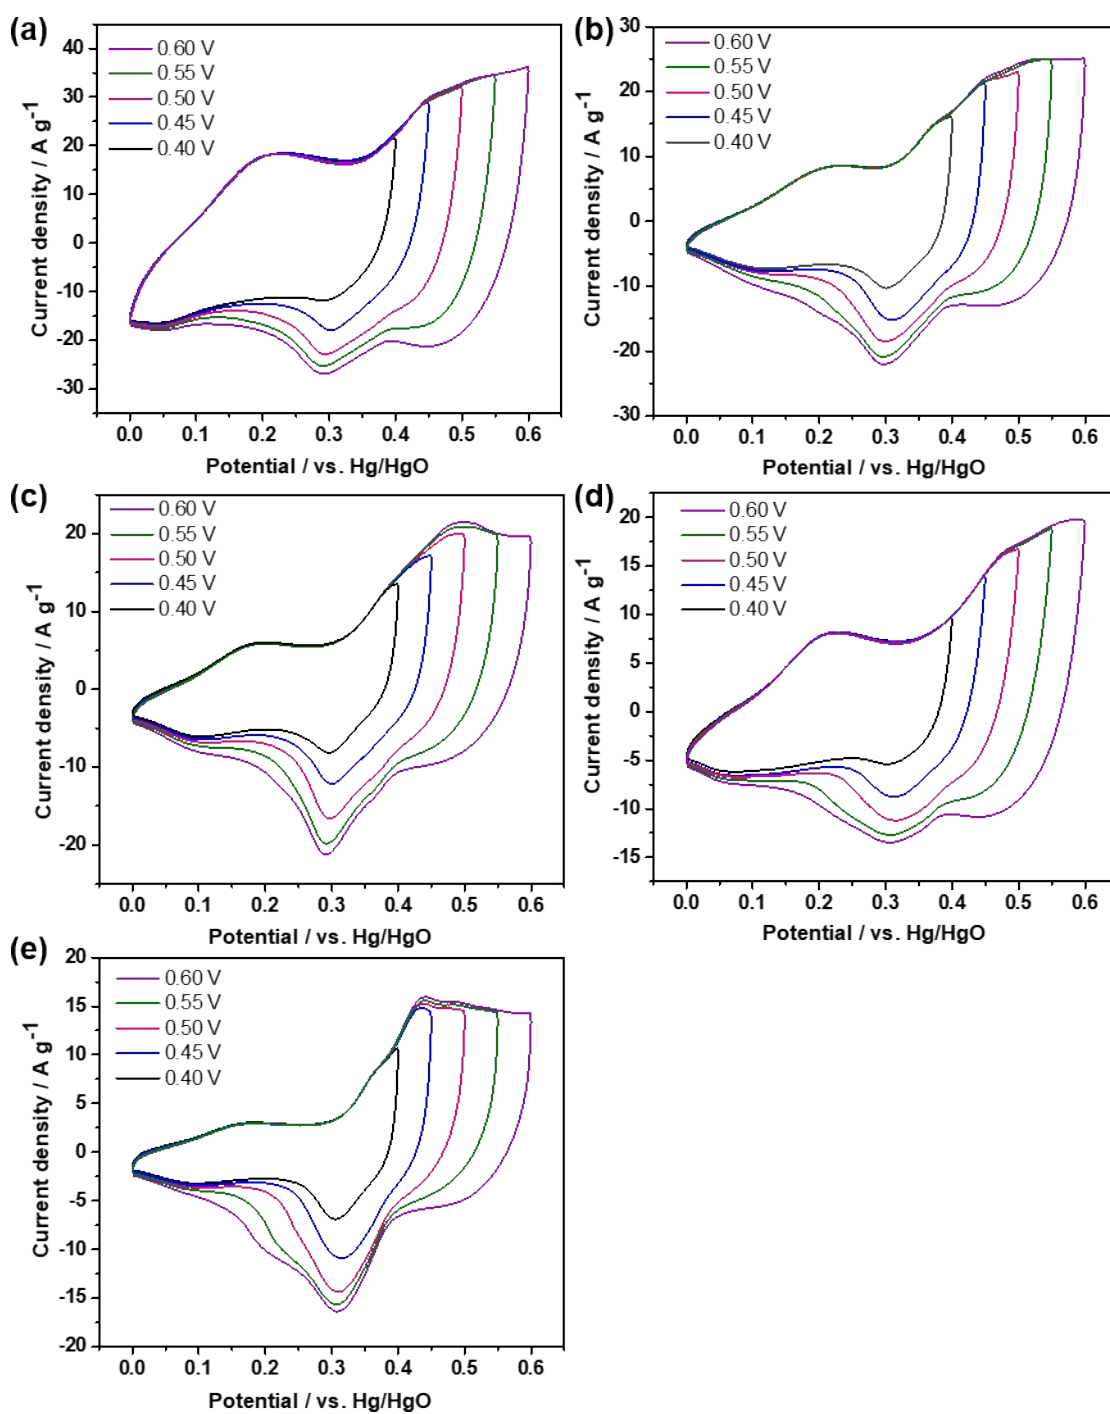

**Fig. S17.** CV curves of (a)  $\alpha$ -CoMn<sub>0.05</sub>(OH)<sub>x</sub>/ZIF-67, (b)  $\alpha$ -CoNi<sub>0.05</sub>(OH)<sub>x</sub>/ZIF-67, (c)  $\alpha$ -CoZn<sub>0.05</sub>(OH)<sub>x</sub>/ZIF-67, (d)  $\alpha$ -Co(OH)<sub>2</sub>/ZIF-67 and (e)  $\alpha$ -Co(OH)<sub>2</sub> at various voltage window.



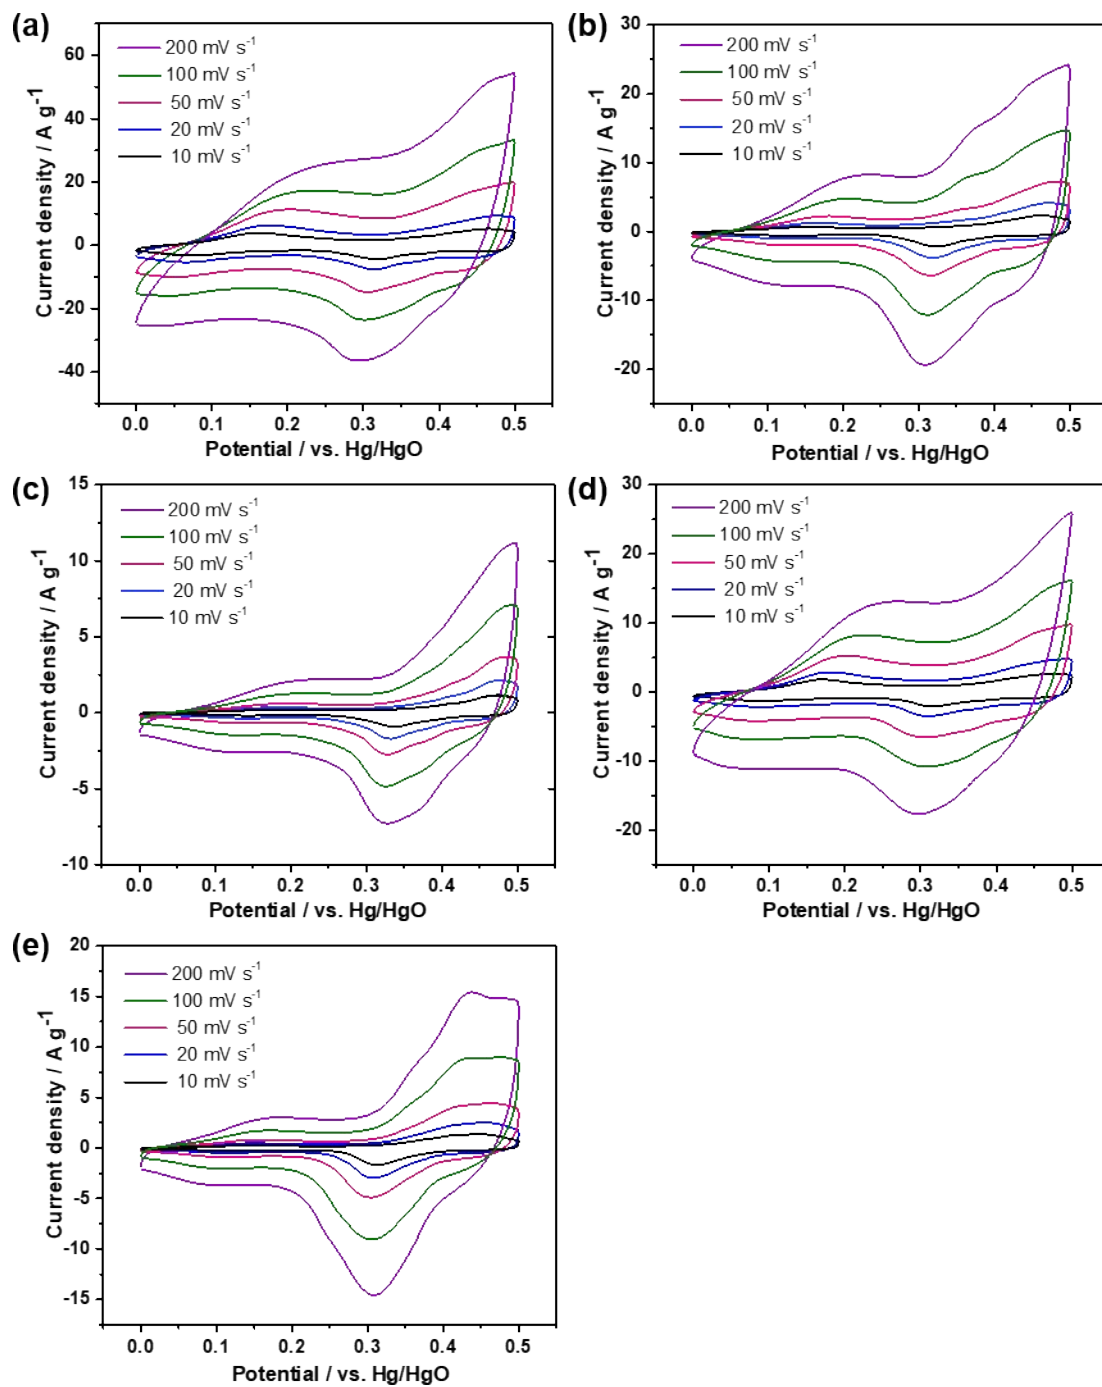

**Fig. S18.** CV curves of (a)  $\alpha$ -CoMn<sub>0.05</sub>(OH)<sub>x</sub>/ZIF-67, (b)  $\alpha$ -CoNi<sub>0.05</sub>(OH)<sub>x</sub>/ZIF-67, (c)  $\alpha$ -CoZn<sub>0.05</sub>(OH)<sub>x</sub>/ZIF-67, (d)  $\alpha$ -Co(OH)<sub>2</sub>/ZIF-67 and (e)  $\alpha$ -Co(OH)<sub>2</sub> at various scan rates.

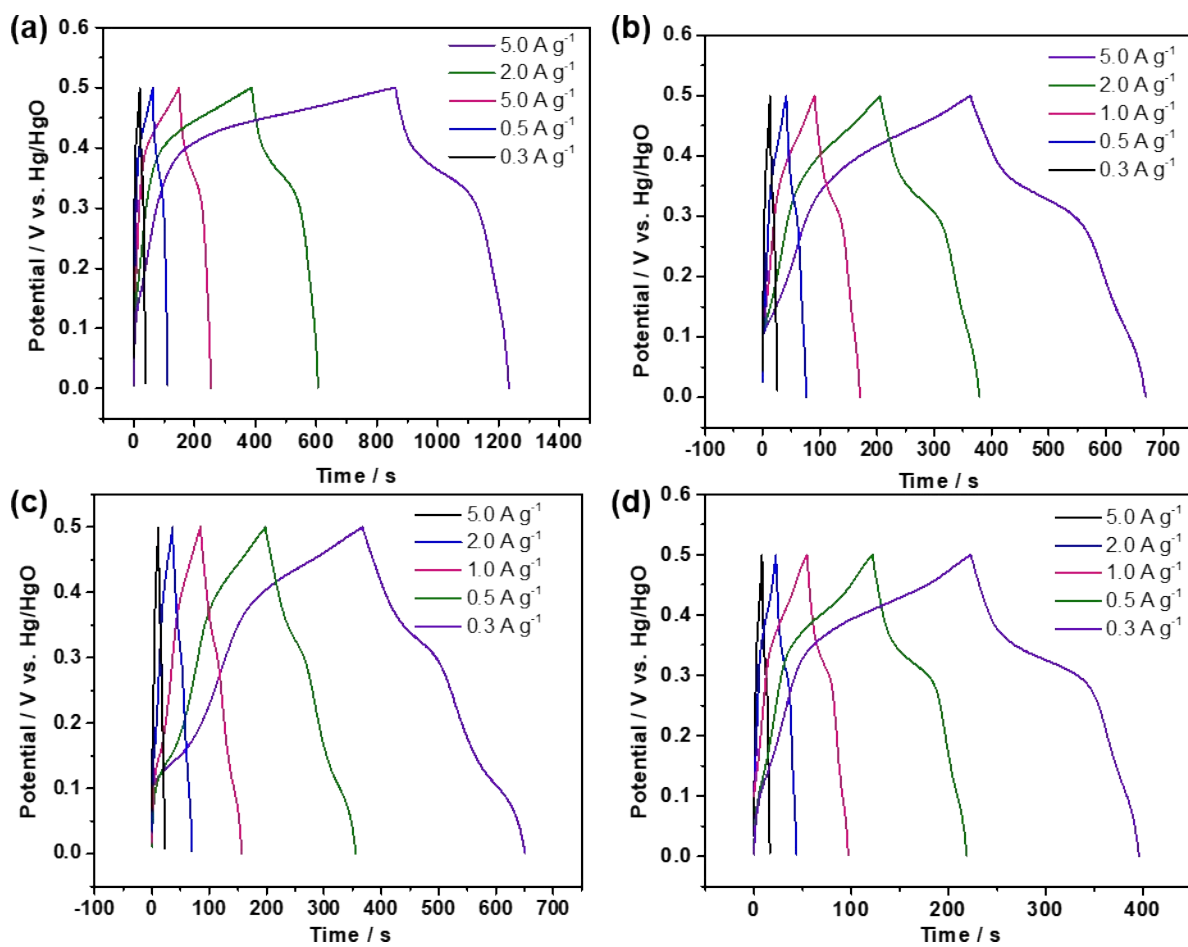

**Fig. S19.** GCD curves of (a)  $\alpha$ -CoNi<sub>0.05</sub>(OH)<sub>x</sub>/ZIF-67, (b)  $\alpha$ -CoZn<sub>0.05</sub>(OH)<sub>x</sub>/ZIF-67, (c)  $\alpha$ -Co(OH)<sub>2</sub>/ZIF-67 and (d)  $\alpha$ -Co(OH)<sub>2</sub>.

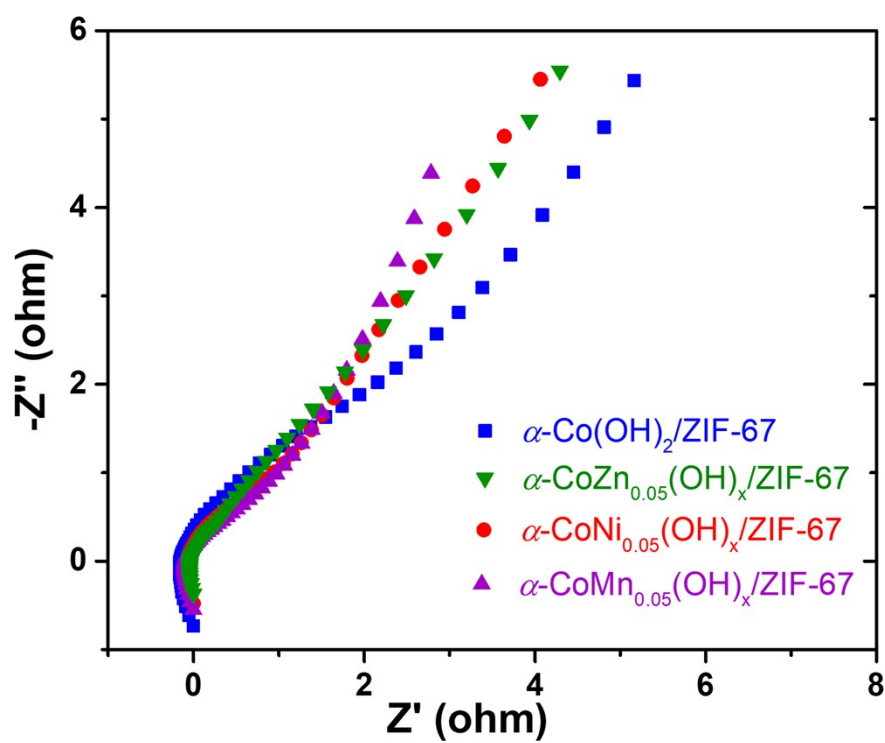

Fig. S20. Nyquist plots measured in the frequency range of 0.01-10<sup>5</sup> Hz.

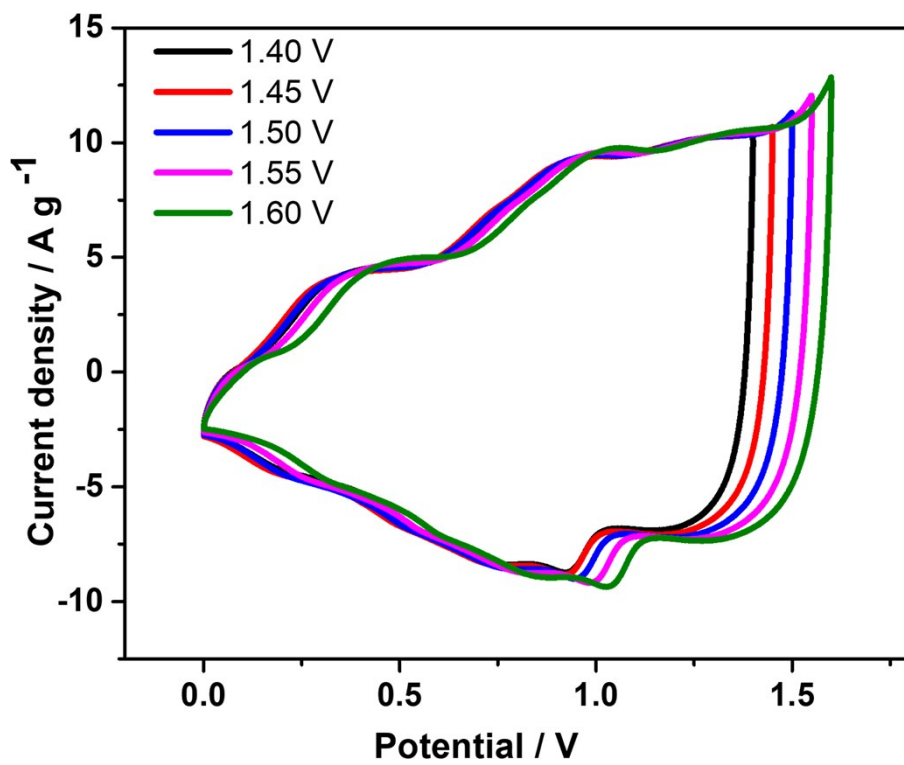

**Fig. S21.** CV curves of  $\alpha\text{-CoMn}_{0.05}(\text{OH})_x/\text{ZIF-67//AC}$  at various voltage windows.

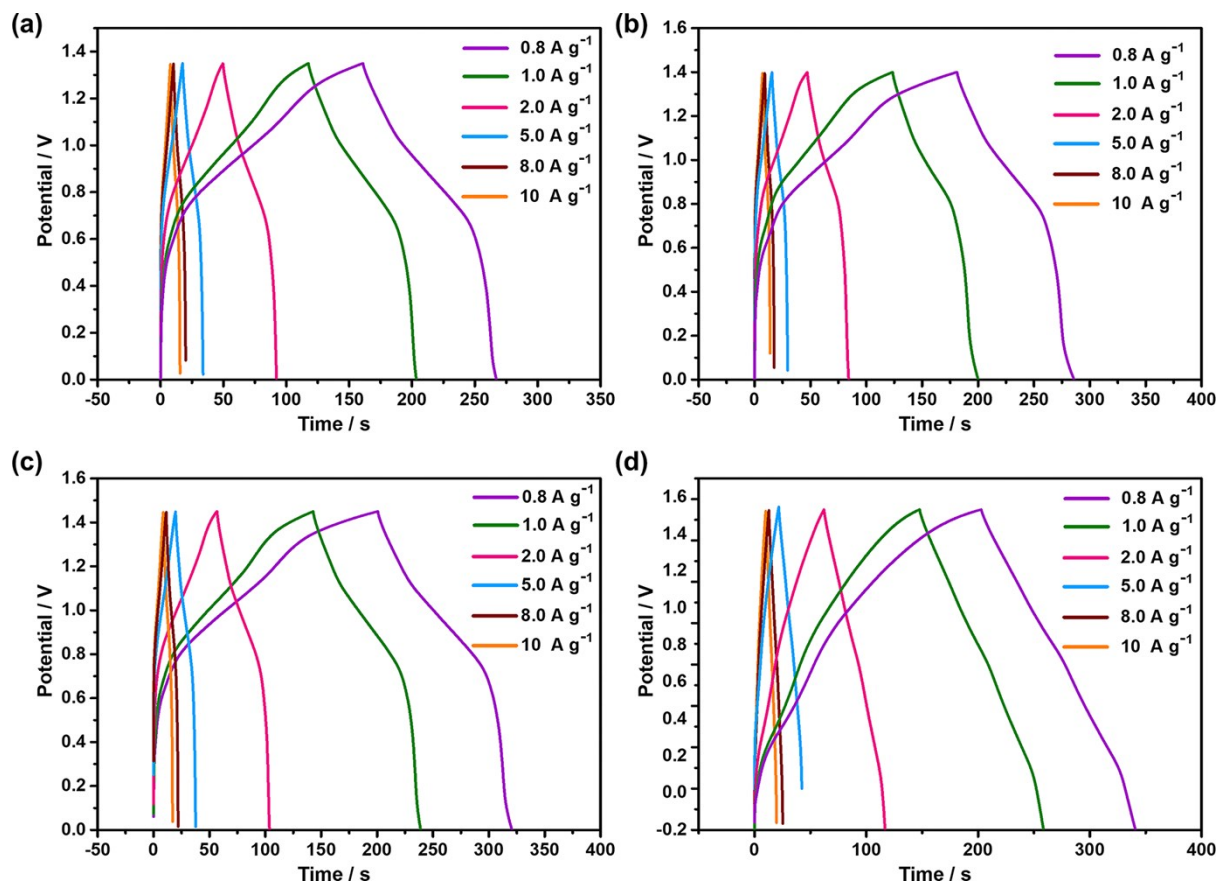

**Fig. S22.** GCD curves of  $\alpha\text{-CoMn}_{0.05}(\text{OH})_x/\text{ZIF-67//AC}$  at various voltage windows of (a) 0-1.35 V, (b) 0-1.40 V, (c) 0-1.45 V, and (d) 0-1.55 V.

Table S2. The relevant electrochemical properties of  $\text{Co(OH)}_2$ , LDH, ZIF-67 and their composites.

| Material                                                    | Potential window / V | Electrolyte                        | Reference electrode | Specific capacitance / $\text{F g}^{-1}$          | Cycling performance (Device)                                                                                           | Reference |
|-------------------------------------------------------------|----------------------|------------------------------------|---------------------|---------------------------------------------------|------------------------------------------------------------------------------------------------------------------------|-----------|
| <b>CoOOH</b>                                                | -0.2-0.6             | 3 M KOH                            | Hg/HgO              | $198 \text{ F g}^{-1}$ at 0.1 A $\text{g}^{-1}$   | 83% retention at 1 A $\text{g}^{-1}$ after 5000 cycles                                                                 | S1        |
| <b><math>\alpha</math>-Co(OH)<sub>2</sub></b>               | 0-0.6                | 6 M KOH                            | Hg/HgO              | $345 \text{ F g}^{-1}$ at 0.1 A $\text{g}^{-1}$   | 86% retention at 5 A $\text{g}^{-1}$ after 15000 cycles                                                                | S2        |
| <b><math>\alpha</math>-Co(OH)<sub>2</sub></b>               | -0.1-0.6             | 6 M KOH                            | SCE                 | $436 \text{ F g}^{-1}$ at 50 mA $\text{cm}^{-2}$  | $549 \text{ F g}^{-1}$ to $960 \text{ F g}^{-1}$ (current density from 25 to 5 mA $\text{cm}^{-2}$ ) after 3000 cycles | S3        |
| <b>(NiCo)(OH)<sub>2</sub>/Cu(OH)<sub>2</sub>/C F</b>        | 0-0.4                | 2 M KOH                            | SCE                 | $849.6 \text{ C g}^{-1}$ at 5 mA $\text{cm}^{-2}$ | 81.03% retention at 100 mA $\text{cm}^{-2}$ after 5000 cycles                                                          | S4        |
| <b>(NiCo)(OH)<sub>2</sub>/NiCo<sub>2</sub>O<sub>4</sub></b> | -0.1-0.45            | 2 M KOH                            | SCE                 | $1132 \text{ F g}^{-1}$ at 2 mA $\text{cm}^{-2}$  | 90% retention at 20 mA $\text{cm}^{-2}$ after 2000 cycles                                                              | S5        |
| <b>Co(OH)<sub>2</sub>/CoNi-MOF</b>                          | 0.05-0.45            | 1 M KOH                            | SCE                 | $1044 \text{ F g}^{-1}$ at 2 A $\text{g}^{-1}$    | 94% retention after 5000 cycles                                                                                        | S6        |
| <b>ZIF-67</b>                                               | -0.3-0.25            | 6 M KOH                            | Ag/AgCl (3.5 M KCl) | $103.6 \text{ F g}^{-1}$ at 1 A $\text{g}^{-1}$   | 59% retention after 1000 cycles at 10 A $\text{g}^{-1}$ (TES)                                                          | S7        |
| <b>Mn doped ZIF-67</b>                                      | 0-0.4                | 3M KOH                             | Hg/HgO              | $322 \text{ F g}^{-1}$ at 3 A $\text{g}^{-1}$     | 64.1% retention after 1500 cycles at 10 A $\text{g}^{-1}$ (TES)                                                        | S8        |
| <b>rGO/ZIF-67</b>                                           | -0.3-0.25            | 6 M KOH                            | Ag/AgCl (3.5 M KCl) | $210 \text{ F g}^{-1}$ at 1 A $\text{g}^{-1}$     | -                                                                                                                      | S7        |
| <b>ZIF-67/GO</b>                                            | -0.3-0.5             | 6 M KOH                            | SCE                 | $202 \text{ F g}^{-1}$ at 1 A $\text{g}^{-1}$     | -                                                                                                                      | S9        |
| <b>Ni<sub>33</sub>/ZIF-67/rGO<sub>20</sub></b>              | -0.2-0.8             | 1 M H <sub>2</sub> SO <sub>4</sub> | SCE                 | $304.2 \text{ F g}^{-1}$ at 1 A $\text{g}^{-1}$   | 87% retention after 4500 cycles                                                                                        | S10       |
| <b>NiAl LDH/Ni-MOF</b>                                      | 0-0.5                | 6 M KOH                            | Hg/HgO              | $1086 \text{ F g}^{-1}$ at 3 A $\text{g}^{-1}$    | 96.4% retention after 10000 cycles at 10 A $\text{g}^{-1}$                                                             | S11       |
| <b>NiV LDH@ZIF-67</b>                                       | 0-0.4                | 6 M KOH                            | -                   | $830.6 \text{ F g}^{-1}$ at 1 A $\text{g}^{-1}$   | 120% retention at 10 A $\text{g}^{-1}$ after 5000 cycles                                                               | S12       |
| <b>Ni<sub>2</sub>CO<sub>3</sub>(OH)<sub>2</sub>@ZIF-67</b>  | -0.15-0.4            | 6 M KOH                            | Ag/AgCl             | $697 \text{ F g}^{-1}$ at 30 mV $\text{s}^{-1}$   | -                                                                                                                      | S13       |

|                                                                       |        |         |        |                                               |                                                              |                  |
|-----------------------------------------------------------------------|--------|---------|--------|-----------------------------------------------|--------------------------------------------------------------|------------------|
| <b>rGO@ZIF-67@NiAl-LDHs</b>                                           | 0-0.36 | 6 M KOH | -      | 2291.6 F g <sup>-1</sup> at 1 A               | 92% retention at 10 A g <sup>-1</sup> after 4000 cycles      | S14              |
| <b>ZIF-67@rGO</b>                                                     | 0-0.36 | 6 M KOH | -      | 90.5 F g <sup>-1</sup> at 1 A g <sup>-1</sup> | -                                                            | S14              |
| <b>rGO@NiAl-LDHs</b>                                                  | 0-0.36 | 6 M KOH | -      | 573.1 F g <sup>-1</sup> at 1 A                | -                                                            | S14              |
| <b><math>\alpha</math>-CoMn<sub>0.05</sub>(OH)<sub>x</sub>/ZIF-67</b> | 0-0.5  | 3 M KOH | Hg/HgO | 703.8 F g <sup>-1</sup> at 0.3 A              | 96.2% retention at 500 mA cm <sup>-2</sup> after 3500 cycles | <b>This work</b> |

Abbreviation: Saturated calomel electrode: SCE, Ultra-stable Y zeolite: USY, Copper foam: CF.

## References

- S1 C. Justin Raj, B. C. Kim, W. J. Cho, S. Park, H. T. Jeong, K. Yoo and K. H. Yu, *J. Electroanal. Chem.*, 2015, **747**, 130–135.
- S2 F. Zhou, Q. Liu, J. Gu, W. Zhang and D. Zhang, *Electrochim. Acta*, 2015, **170**, 328–336.
- S3 Z. Gao, W. Yang, Y. Yan, J. Wang, J. Ma, X. Zhang, B. Xing and L. Liu, *Eur. J. Inorg. Chem.*, 2013, **2013**, 4832–4838.
- S4 D. Zhang, Y. Shao, X. Kong, M. Jiang, D. Lei and X. Lei, *Electrochim. Acta*, 2016, **218**, 294–302.
- S5 X. Gong, J. P. Cheng, F. Liu, L. Zhang and X. Zhang, *J. Power Sources*, 2014, **267**, 610–616.
- S6 T. Deng, Y. Lu, W. Zhang, M. Sui, X. Shi, D. Wang and W. Zheng, *Adv. Energy Mater.*, 2018, **8**, 1702294.
- S7 A. Hosseini, A. H. Amjad, R. Hosseinzadeh-Khanmiri, E. Ghorbani-Kalhor, M. Babazadeh and E. Vessally, *J. Mater. Sci. : Mater. Electron.*, 2017, **28**, 18040–18048.
- S8 Y. Wenping, S. Xinyue, L. Yan and H. Pang, *J. Energy Storage*, 2019, **26**, 101018.
- S9 W. Zhang, Y. Tan, Y. Gao, J. Wu, J. Hu, A. Stein and B. Tang, *J. Appl. Electrochem.*, 2016, **46**, 441–450.
- S10 S. Sundriyal, V. Shrivastav, S. Mishra and A. Deep, *Int. J. Hydrogen Energy*, 2020, **45**, 30859–30869.
- S11 W. Zheng, S. Sun, Y. Xu, R. Yu and H. Li, *ChemElectroChem*, 2019, **6**, 3375–3382.
- S12 G. Wang, Y. Li, L. Xu, Z. Jin and Y. Wang, *Renew. Energy*, 2020, **162**, 535–549.
- S13 Y. Gao, J. Wu, W. Zhang, Y. Tan, J. Gao, B. Tang and J. Zhao, *J. Appl. Electrochem.*,



2015, **45**, 541–547.

S14 D. Guo, X. Song, L. Tan, H. Ma, W. Sun, H. Pang, L. Zhang and X. Wang, *Chem. Eng. J.*,  
2019, **356**, 955–963.
